# Supplementary material for: Novel catanionic vesicles from calixarene and single-chain surfactant
Source: Royal Society of Chemistry journal article supplement (doi:10.1039/c0cc01806f), 2010-01-01
Supplement: c0cc01806f.pdf [file c0cc01806f.pdf]

## Electronic Supplementary Information : Novel Catanionic Vesicles from Calixarene and Single-Chain Surfactant

Vitor Francisco<sup>a</sup>, Nuno Basilio<sup>a</sup>, Luis Garcia-Rio\*<sup>a</sup>, J. Ramon Leis<sup>a</sup>, Eduardo F. Marques<sup>b</sup>, Carlos Vázquez-Vázquez<sup>a</sup>

<sup>a</sup> *Departamento de Química Física. Facultad de Química. Universidad de Santiago. 15782 Santiago. Spain. E-mail: luis.garcia@usc.es*

<sup>b</sup> *Centro de Investigação em Química, Department of Chemistry, Faculty of Science, University of Porto, Rua do Campo Alegre, no. 687, P 4169-007 Porto, Portugal*

### I. Material and Methods

#### II. Dynamic Light Scattering data

### I. Material and Methods

**Synthesis of Calixarene:** *p*-Sulfonatocalix[4]arene (SC4) was prepared by *ipso*-sulfonation of *p-tert* butylcalixarene in H<sub>2</sub>SO<sub>4</sub> at 80 °C. The pentasodium salt (SC4Na) of SC4 was obtained by neutralization of the acid form of SC4 with Na<sub>2</sub>CO<sub>3</sub> in H<sub>2</sub>O. Finally, the sodium salt was purified by recrystallization three times from water/methanol mixtures.

**Sonication procedure.** The vesicles were prepared as follows: a certain amount of *p*-SC4 and TTABr was dispersed in 40 mL of water at 60 °C. Then the solution was sonicated using a Branson Sonifier 450 with a probe containing a 13 mm flat tip. The tip was submerged approximately two-thirds of the sample height and the power monitor indicated 20%. After every 5 min of sonication, the sample was left at rest during 2 min. The sonication time was always 30 min in total. Samples were then equilibrated to room temperature and filtered through a 0.45 μm pore size filter in order to eliminate possible titanium particles.

**NMR.** The <sup>1</sup>H NMR spectra in D<sub>2</sub>O solution were measured with a Varian Mercury 300 MHz NMR spectrometer.

**Zeta-potential measurement.** Vesicle electrophoretic mobilities were measured using a Malvern Zetasizer 2000. The ζ-potentials were calculated using the Smoluchowski equation. All samples were filtered prior to the measurement that was performed at 25 °C.

**TEM.** Vesicles were imaged with a PHILIPS CM-12 transmission electron microscope at 100kV using the negative staining method. A drop of vesicle solution was spread on a 200-mesh copper grid coated with a Formvar film, and the extra droplet was instantly wiped off by filter paper. After being naturally desiccated, a drop of 2% phosphotungstic acid solution was dropped on the copper grid for about 60 s and the

extra droplet was also removed. Then the grid was dried naturally for about 3 h before TEM observation.

**Lyophilization.** The sample is cooled with liquid nitrogen, causing ice crystals to nucleate and grow. The sublimation of the ice with a TELSTAR lyophilizator yielded a freeze-dried powder.

**Light scattering.** Light scattering was performed using an ALV SP-86 goniometer, ALV 5000 Multi-tau correlator and a Coherent Sapphire optically pumped semiconductor laser operating at a wavelength of 488 nm and a power of 200 mW. The correlation functions were accumulated for 100 s and analysed using the ALV Correlator Software (ALV-5000/E version 3.0) based on the CONTIN algorithm adapted to the specific correlator noise. Temperature was fixed to 25 °C. The logarithmically sampled relaxation time spectra (amplitude vs.  $\log(\tau)$ ) were obtained from the CONTIN inversion of the normalised correlation functions. Assuming homodyne light beating, the distribution of diffusivities were obtained applying the relation  $D = 1 / (q^2 \tau)$ , and transformed using the Stokes-Einstein relation, the electrolyte solvent viscosity  $\eta_0$  and refractive index  $n$  at the actual temperature  $T$  in order to yield the hydrodynamic radius  $R_H = kTq^2 \tau / 6\pi\eta_0$  where  $k$  is the Boltzmann constant,  $q = (4\pi n/\lambda) \cdot \sin(\theta/2)$  is the scattering vector as a function of wavelength in vacuum,  $\lambda$ , and scattering angle  $\theta$ . Measurements were performed at angles between 30 and 150° with increments of 15°.

**Light Microscopy.** An Axioplan Universal light microscope from Carl Zeiss, equipped with differential interference contrast (DIC) lenses and a video-camera system, was used.

## II. Dynamic Light Scattering data

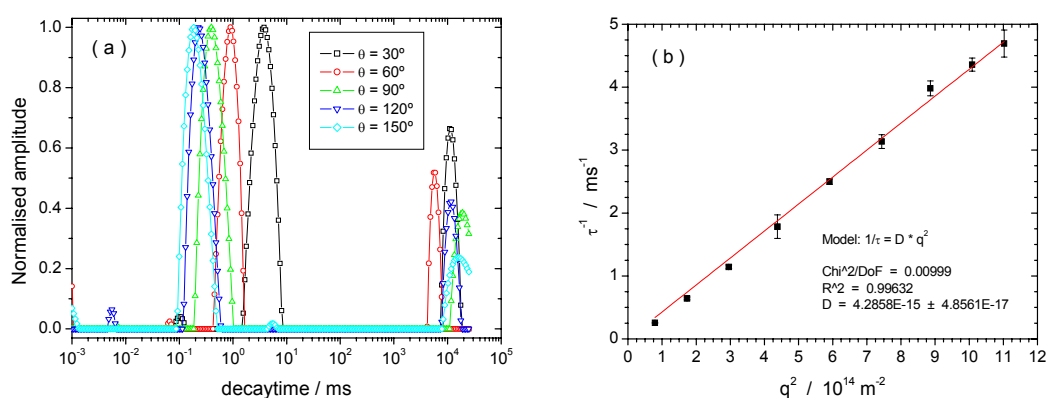

**Fig. 1** DLS data of negatively charged catanionic vesicles a few hours after preparation: (a) angular dependence; (b) determination of the diffusion coefficient of the vesicles.

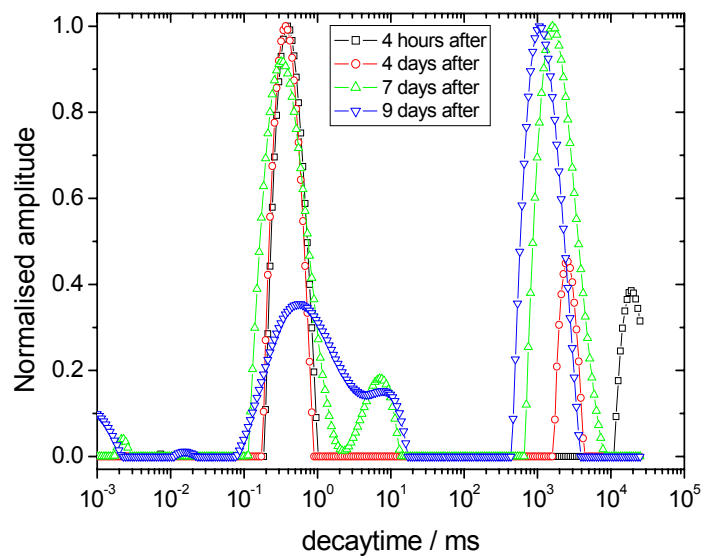

**Fig. 2** Time evolution of the DLS for negatively charged vesicles.

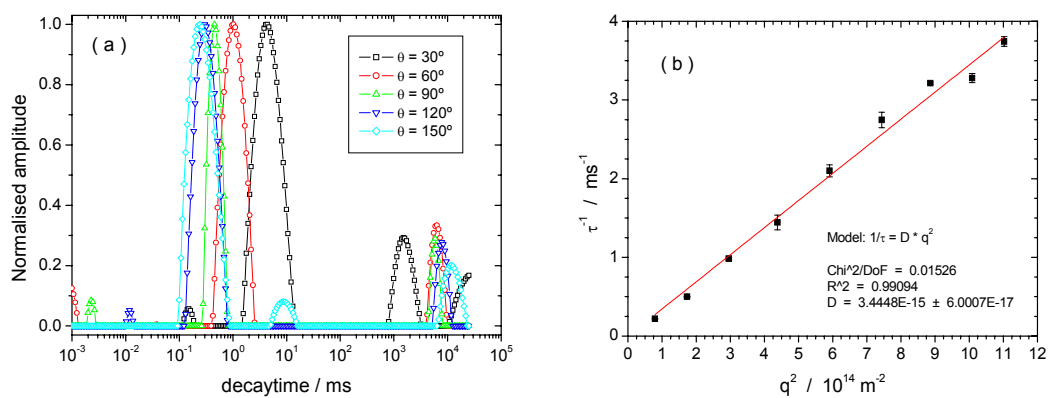

**Fig. 3** DLS for negative vesicles after lyophilization, measured 3 days after redispersion: (a) angular dependence; (b) determination of the diffusion coefficient of the vesicles
